# Supplementary material
Source: HighWire-hosted journal article supplement (https://rmdopen.bmj.com/content/9/1/e002721)
Supplement: inline-supplementary-material-1 [file inline-supplementary-material-1.pdf]

## Supplementary materials

- Supplementary Table 1. Trial designs used to derive meaningful change and severity thresholds for ESSPRI
- Supplementary Table 2. Instrument administration across trials
- Supplementary Table 3. Anchor groups used for meaningful change threshold analyses
- Supplementary Table 4: COA score descriptive statistics at each timepoint for both analysis samples
- Supplementary Table 5a. Change correlations between ESSPRI total score and proposed anchors for Phase IIb analyses
- Supplementary Table 5b. Change correlations between ESSPRI total score and proposed anchors for pooled analyses
- Supplementary Figure 1. Box plots showing the spread of ESSPRI scores for the three severity groups of patients based on the PaGA Stratification A anchor at Week 24 (Analysis 1)\*
- Supplementary Figure 2. Box plots showing the spread of ESSPRI scores for the three severity groups of patients based on the PaGA Stratification B anchor at Week 24 (Analysis 1)\*
- Supplementary Figure 3. Box plots showing the spread of ESSPRI total scores for the three severity groups of patients based on the PaGA Stratification B at Week 24 (Analysis 2)\*
- Supplementary Figure 4. Box plots showing the spread of ESSPRI total scores for the three severity groups of patients based on the PhGA Stratification B at Week 24 (Analysis 2)\*

## Supplementary Table 1

Supplementary Table 1. Trial designs used to derive meaningful change and severity thresholds for ESSPRI

| Trial, Number of Subjects (N=), and analyses        | Screening         | Baseline period  | Randomization | Treatment period                                                                                                                                      | Treatment/placebo administration                                                                                                                                                                                                                                                                                                                                                                                    | Study visits                                                                                                              | Follow-up                                                                       |
|-----------------------------------------------------|-------------------|------------------|---------------|-------------------------------------------------------------------------------------------------------------------------------------------------------|---------------------------------------------------------------------------------------------------------------------------------------------------------------------------------------------------------------------------------------------------------------------------------------------------------------------------------------------------------------------------------------------------------------------|---------------------------------------------------------------------------------------------------------------------------|---------------------------------------------------------------------------------|
| <b>CVAY736A2201 (N=192)</b><br>(Phase IIb analyses) | Day -28 to Day -1 | Day 1            | Day 1         | 4-arm double-blind treatment Day 1 to Day 168 (Week 24)<br>3-arm double-blind treatment Day 169 to Day 364 (Week 28)                                  | VAY736A vs placebo: Injection administered subcutaneously (SC) every 4 weeks                                                                                                                                                                                                                                                                                                                                        | Screening; Baseline; Weeks 4, 8, 12, 16, 20, 24, 28, 32, 36, 40, 44, 48, 52, 56, 60, 64 plus conditional follow-up visits | Day 365 to Day 504 (Week 72)                                                    |
| <b>CCFZ533X2203 (N=69)</b><br>(Pooled analyses)     | Day -28 to Day -2 | Day -1           | Day 1         | Placebo-controlled Day 1 to Day 85 (Week 13)<br>Open label Day 85 to Day 141 (Week 21)                                                                | Cohort 1: CFZ533 vs placebo, administered SC at Weeks 1, 3, 5, 9, 13, 15, 17, 21<br>Cohort 2: CFZ533 vs placebo administered by intravenous infusion (IV) at Weeks 1, 3, 5, 9, 13, 15, 17, 21<br>Cohort 3 CFZ533:<br><ul style="list-style-type: none"> <li>• SC once a week for 4 weeks followed by SC one a week for 9 weeks</li> <li>• IV at Day 1 followed by SC once a week from Day 8 for 12 weeks</li> </ul> | Screening; Baseline; Weeks 1, 3, 5, 9, 11, 13, 15, 17, 19, 21, 25, 29, 33                                                 | Day 160 to Day 226 (Week 33)                                                    |
| <b>CCVAY736X2201 (N=27)</b><br>(Pooled analyses)    | Day -35 to Day -7 | Day -7 to Day -1 | Day 1         | Placebo controlled Day 1 to Day 168 (Week 24)<br>Placebo patients may enter into open-label treatment following unblinding and restart study at Day 1 | Single IV dose of CVAY736 or placebo on Day 1                                                                                                                                                                                                                                                                                                                                                                       | Screening; Baseline; Weeks 1, 2, 3, 6, 9, 12, 16, 20, 24                                                                  | Up to 1 month after a patient's circulating B cells meet criteria for recovery. |
| <b>CCDZ173X2203 (N=30)</b><br>(Pooled analyses)     | Day -28 to Day -2 | Day -1           | Day 1         | Placebo-controlled Day 1 to Day 91                                                                                                                    | Oral dose twice a day                                                                                                                                                                                                                                                                                                                                                                                               | Screening; Baseline; Weeks 1, 2, 3, 5, 9, 13, 17                                                                          | Day 91 to Day 119 (Week 17)                                                     |

## Supplementary Table 2

Supplementary Table 2. Instrument administration across trials

| Instrument           | Description                                                                                 | Trial                         |                         |                            |                         |
|----------------------|---------------------------------------------------------------------------------------------|-------------------------------|-------------------------|----------------------------|-------------------------|
|                      |                                                                                             | CVAY736A2201 (Phase IIb data) | CFZ533<br>(Pooled data) | CVAY736X2201 (Pooled data) | CDZ173<br>(Pooled data) |
| ESSPRI <sup>1</sup>  | 3-item patient-reported assessment of severity of pain, dryness, and fatigue                | ✓                             | ✓                       | ✓                          | ✓                       |
| ESSDAI <sup>2</sup>  | 12-domain physician-reported assessment of disease activity in organ-specific domains       | ✓                             | ✓                       | ✓                          | ✓                       |
| PaGA                 | Single item patient-reported global assessment of overall disease activity on 0-100mm VAS   | ✓                             | ✓                       | ✓                          | ✓                       |
| PhGA                 | Single item physician-reported global assessment of overall disease activity on 0-100mm VAS | ✓                             | ✓                       | ✓                          | ✓                       |
| SF-36 <sup>3</sup>   | 36-item patient-reported assessment of general health status and disease burden             | ✓                             | ✓                       | ✓                          | ✓                       |
| FACIT-F <sup>4</sup> | 13-item patient-reported assessment of fatigue and tiredness related to daily activities    | ✓                             | ✗                       | ✗                          | ✗                       |
| MFI <sup>5</sup>     | 20-item patient-reported assessment of fatigue                                              | ✗                             | ✓                       | ✓                          | ✓                       |

✓ denotes administration in trial at baseline, Week 12, and Week 24  
✗ indicates instrument was not administered in trial

## Supplementary Table 3

Supplementary Table 3. Anchor groups used for meaningful change threshold analyses

| Anchor Hierarchy       | Anchor Measure                         | Timepoints          | Definition                                                                                                                                                                                                                                                                                                                                                                                                                                                                                                                                                                                                                                             |
|------------------------|----------------------------------------|---------------------|--------------------------------------------------------------------------------------------------------------------------------------------------------------------------------------------------------------------------------------------------------------------------------------------------------------------------------------------------------------------------------------------------------------------------------------------------------------------------------------------------------------------------------------------------------------------------------------------------------------------------------------------------------|
| 1a                     | PaGA (Stratification A) <sup>6,7</sup> | Baseline to Week 24 | <ul style="list-style-type: none"> <li>• <b>Moderate-major improvement:</b> Patients with &gt;20mm improvement between each analysis timepoint</li> <li>• <b>Minimal Improvement:</b> Patients with &gt;10mm and ≤20mm improvement between each analysis timepoint</li> <li>• <b>Stable:</b> Patients with ≤10mm change between each analysis timepoint</li> <li>• <b>Minimal Worsening:</b> Patients with &gt;10mm and ≤20mm worsening between each analysis timepoint</li> <li>• <b>Moderate-major worsening:</b> Patients with &gt;20mm worsening between each analysis timepoint</li> </ul>                                                        |
| 1b                     | PaGA (Stratification B) <sup>8,9</sup> | Baseline to Week 24 | <ul style="list-style-type: none"> <li>• <b>Moderate-major improvement:</b> Patients with &gt;40mm improvement between each analysis timepoint</li> <li>• <b>Minimal Improvement:</b> Patients with &gt;20mm and ≤40mm improvement between each analysis timepoint</li> <li>• <b>Stable:</b> Patients with ≤20mm change between each analysis timepoint</li> <li>• <b>Minimal Worsening:</b> Patients with &gt;20mm and ≤40mm worsening between each analysis timepoint</li> <li>• <b>Moderate-major worsening:</b> Patients with &gt;40mm worsening between each analysis timepoint</li> </ul>                                                        |
| 1c                     | PaGA (Stratification C) <sup>10</sup>  | Baseline to Week 24 | <ul style="list-style-type: none"> <li>• <b>Moderate-major improvement:</b> Patients with &gt;0.50 Baseline SD improvement between each analysis timepoint</li> <li>• <b>Minimal Improvement:</b> Patients with &gt;0.20 and ≤0.50 Baseline SD improvement between each analysis timepoint</li> <li>• <b>Stable:</b> Patients with ≤0.20 SD change between each analysis timepoint</li> <li>• <b>Minimal Worsening:</b> Patients with &gt;0.20 and ≤0.50 Baseline SD worsening between each analysis timepoint</li> <li>• <b>Moderate-major worsening:</b> Patients with &gt;0.50 Baseline SD worsening between each analysis timepoint</li> </ul>     |
| 2 (Phase IIb analysis) | FACIT-F <sup>8,11,12</sup>             | Baseline to Week 24 | <ul style="list-style-type: none"> <li>• <b>Moderate-major improvement:</b> Patients with &gt;6-point improvement between each analysis timepoint</li> <li>• <b>Minimal Improvement:</b> Patients with an improvement of between 4- and 6-points (inclusive) between each analysis timepoint</li> <li>• <b>Stable:</b> Patients with a &lt;4-point change between each analysis timepoint</li> <li>• <b>Minimal Worsening:</b> Patients with a worsening between 4- and 6-point (inclusive) between each analysis timepoint</li> <li>• <b>Moderate-major worsening:</b> Patients with &gt;6-point worsening between each analysis timepoint</li> </ul> |
| 2 (Pooled analysis)    | MFI <sup>11</sup>                      | Baseline to Week 24 | <ul style="list-style-type: none"> <li>• <b>Moderate-major improvement:</b> Patients with ≥32-point improvement between each analysis timepoint</li> <li>• <b>Minimal Improvement:</b> Patients with ≥16-point and &lt;32-point improvement between each analysis timepoint</li> <li>• <b>Stable:</b> Patients with &lt;16-point change between each analysis timepoint</li> <li>• <b>Minimal Worsening:</b> Patients with ≥16-point and &lt;32-point worsening between each analysis timepoint</li> <li>• <b>Moderate-major worsening:</b> Patients with ≥32-point worsening between each analysis timepoint</li> </ul>                               |
| 3a                     | PhGA (Stratification A) <sup>6,7</sup> | Baseline to Week 24 | <ul style="list-style-type: none"> <li>• <b>Moderate-major improvement:</b> Patients with &gt;20mm improvement between each analysis timepoint</li> <li>• <b>Minimal Improvement:</b> Patients with &gt;10mm and ≤20mm improvement between each analysis timepoint</li> <li>• <b>Stable:</b> Patients with ≤10mm change between each analysis timepoint</li> <li>• <b>Minimal Worsening:</b> Patients with &gt;10mm and ≤20mm worsening between each analysis timepoint</li> <li>• <b>Moderate-major worsening:</b> Patients with &gt;20mm worsening between each analysis timepoint</li> </ul>                                                        |

**Supplementary Table 3. Anchor groups used for meaningful change threshold analyses**

| Anchor Hierarchy | Anchor Measure                         | Timepoints          | Definition                                                                                                                                                                                                                                                                                                                                                                                                                                                                                                                                                                                                                                         |
|------------------|----------------------------------------|---------------------|----------------------------------------------------------------------------------------------------------------------------------------------------------------------------------------------------------------------------------------------------------------------------------------------------------------------------------------------------------------------------------------------------------------------------------------------------------------------------------------------------------------------------------------------------------------------------------------------------------------------------------------------------|
| <b>3b</b>        | PhGA (Stratification B) <sup>8,9</sup> | Baseline to Week 24 | <ul style="list-style-type: none"> <li>• <b>Moderate-major improvement:</b> Patients with &gt;30mm improvement between each analysis timepoint</li> <li>• <b>Minimal Improvement:</b> Patients with &gt;15mm and ≤30mm improvement between each analysis timepoint</li> <li>• <b>Stable:</b> Patients with ≤15mm change between each analysis timepoint</li> <li>• <b>Minimal Worsening:</b> Patients with &gt;15mm and ≤30mm worsening between each analysis timepoint</li> <li>• <b>Moderate-major worsening:</b> Patients with &gt;30mm worsening between each analysis timepoint</li> </ul>                                                    |
| <b>3c</b>        | PhGA (Stratification C) <sup>10</sup>  | Baseline to Week 24 | <ul style="list-style-type: none"> <li>• <b>Moderate-major improvement:</b> Patients with &gt;0.50 Baseline SD improvement between each analysis timepoint</li> <li>• <b>Minimal Improvement:</b> Patients with &gt;0.20 and ≤0.50 Baseline SD improvement between each analysis timepoint</li> <li>• <b>Stable:</b> Patients with ≤0.20 SD change between each analysis timepoint</li> <li>• <b>Minimal Worsening:</b> Patients with &gt;0.20 and ≤0.50 Baseline SD worsening between each analysis timepoint</li> <li>• <b>Moderate-major worsening:</b> Patients with &gt;0.50 Baseline SD worsening between each analysis timepoint</li> </ul> |
| <b>4</b>         | ESSDAI <sup>13</sup>                   | Baseline to Week 24 | <ul style="list-style-type: none"> <li>• <b>Moderate-major improvement:</b> Patients with ≥6-point improvement between each analysis timepoint</li> <li>• <b>Minimal Improvement:</b> Patients with ≥3-point and &lt;6-point improvement between each analysis timepoint</li> <li>• <b>Stable:</b> Patients with &lt;3-point change between each analysis timepoint</li> <li>• <b>Minimal Worsening:</b> Patients with ≥3-point and &lt;6-point worsening between each analysis timepoint</li> <li>• <b>Moderate-major worsening:</b> Patients with ≥6-point worsening between each analysis timepoint</li> </ul>                                  |
| <b>5a</b>        | SF-36 PCS <sup>14</sup>                | Baseline to Week 24 | <ul style="list-style-type: none"> <li>• <b>Moderate-major improvement:</b> Patients with ≥14-point improvement between each analysis timepoint</li> <li>• <b>Minimal Improvement:</b> Patients with ≥7-point and &lt;14-point improvement between each analysis timepoint</li> <li>• <b>Stable:</b> Patients with &lt;7-point change between each analysis timepoint</li> <li>• <b>Minimal Worsening:</b> Patients with ≥7-point and &lt;14-point worsening between each analysis timepoint</li> <li>• <b>Moderate-major worsening:</b> Patients with ≥14-point worsening between each analysis timepoint</li> </ul>                              |
| <b>5b</b>        | SF-36 MCS                              | Baseline to Week 24 | <ul style="list-style-type: none"> <li>• <b>Moderate-major improvement:</b> Patients with ≥14-point improvement between each analysis timepoint</li> <li>• <b>Minimal Improvement:</b> Patients with ≥7-point and &lt;14-point improvement between each analysis timepoint</li> <li>• <b>Stable:</b> Patients with &lt;7-point change between each analysis timepoint</li> <li>• <b>Minimal Worsening:</b> Patients with ≥7-point and &lt;14-point worsening between each analysis timepoint</li> <li>• <b>Moderate-major worsening:</b> Patients with ≥14-point worsening between each analysis timepoint</li> </ul>                              |

## Supplementary Table 4

Supplementary Table 4: COA score descriptive statistics at each timepoint for both analysis samples

| Clinical Outcome Assessment                                                                 | Phase IIB analyses          |                            |                            | Pooled analyses             |                            |                           |
|---------------------------------------------------------------------------------------------|-----------------------------|----------------------------|----------------------------|-----------------------------|----------------------------|---------------------------|
|                                                                                             | Baseline assessment (N=190) | Week 12 assessment (N=190) | Week 24 assessment (N=190) | Baseline assessment (N=126) | Week 12 assessment (N=116) | Week 24 assessment (N=69) |
| <b>EULAR Sjögren's Syndrome Patient Reported Index (ESSPRI) Total Score</b>                 |                             |                            |                            |                             |                            |                           |
| n                                                                                           | 190                         | 184                        | 177                        | 126                         | 116                        | 68                        |
| Mean (SD)                                                                                   | 7.2 (1.34)                  | 5.8 (1.96)                 | 5.5 (2.10)                 | 6.8 (1.6)                   | 5.6 (2.1)                  | 5.5 (2.0)                 |
| Median                                                                                      | 7.7                         | 6.0                        | 5.7                        | 7.0                         | 5.7                        | 5.7                       |
| Min, Max                                                                                    | 3, 10                       | 1, 10                      | 0, 10                      | 2.3, 10.0                   | 0.7, 9.3                   | 0.7, 9.0                  |
| Missing                                                                                     | 0 (0.0%)                    | 6 (3.2%)                   | 13 (6.8%)                  | 0 (0.0%)                    | 0 (0.0%)                   | 1 (1.4%)                  |
| <b>EULAR Sjögren's Syndrome Disease Activity Index (ESSDAI) Total Score</b>                 |                             |                            |                            |                             |                            |                           |
| n                                                                                           | 190                         | 183                        | 178                        | 126                         | 116                        | 68                        |
| Mean (SD)                                                                                   | 13.4 (7.27)                 | 7.9 (6.61)                 | 6.4 (6.07)                 | 11.1 (4.8)                  | 7.2 (5.8)                  | 7.4 (6.1)                 |
| Median                                                                                      | 11.0                        | 7.0                        | 5.0                        | 10.0                        | 6.0                        | 6.0                       |
| Min, Max                                                                                    | 4, 53                       | 0, 54                      | 0, 47                      | 4.0, 31.0                   | 0.0, 33.0                  | 0.0, 27.0                 |
| Missing                                                                                     | 0 (0.0%)                    | 7 (3.6%)                   | 12 (6.3%)                  | 0 (0.0%)                    | 0 (0.0%)                   | 1 (1.4%)                  |
| <b>Patient's Global Assessment of Overall Disease Activity (PaGA)</b>                       |                             |                            |                            |                             |                            |                           |
| n                                                                                           | 187                         | 184                        | 177                        | 125                         | 116                        | 68                        |
| Mean (SD)                                                                                   | 63.6 (20.31)                | 48.7 (21.69)               | 47.0 (23.93)               | 56.2 (15.5)                 | 38.4 (21.3)                | 39.4 (22.3)               |
| Median                                                                                      | 66.0                        | 51.0                       | 48.0                       | 58.0                        | 36.0                       | 35.0                      |
| Min, Max                                                                                    | 7, 100                      | 2, 99                      | 1, 100                     | 17.0, 88.0                  | 4.0, 91.0                  | 4.0, 82.0                 |
| Missing                                                                                     | 3 (1.5%)                    | 6 (3.2%)                   | 13 (6.8%)                  | 1 (0.8%)                    | 0 (0.0%)                   | 1 (1.4%)                  |
| <b>Physician's Global Assessment of Overall Disease Activity (PhGA)</b>                     |                             |                            |                            |                             |                            |                           |
| n                                                                                           | 190                         | 175                        | 170                        | 126                         | 116                        | 68                        |
| Mean (SD)                                                                                   | 55.1 (16.24)                | 31.7 (16.77)               | 27.3 (18.15)               | 59.1 (21.3)                 | 46.2 (24.9)                | 49.8 (24.5)               |
| Median                                                                                      | 57.0                        | 30.0                       | 24.0                       | 62.6                        | 46.0                       | 51.5                      |
| Min, Max                                                                                    | 17, 98                      | 1, 80                      | 0, 81                      | 4.0, 97.0                   | 2.0, 100.0                 | 3.0, 98.0                 |
| Missing                                                                                     | 0 (0.0%)                    | 15 (7.9%)                  | 20 (10.5%)                 | 0 (0.0%)                    | 0 (0.0%)                   | 1 (1.4%)                  |
| <b>Short Form-36 Health Survey (SF-36)</b>                                                  |                             |                            |                            |                             |                            |                           |
| <b>SF-36: Physical Component Score (PCS)</b>                                                |                             |                            |                            |                             |                            |                           |
| n                                                                                           | 187                         | 184                        | 177                        | 98                          | 89                         | 63                        |
| Mean (SD)                                                                                   | 38.7 (7.58)                 | 42.5 (7.79)                | 43.0 (8.00)                | 41.0 (8.1)                  | 44.0 (8.8)                 | 44.7 (8.9)                |
| Median                                                                                      | 37.9                        | 41.7                       | 43.5                       | 40.4                        | 43.7                       | 46.0                      |
| Min, Max                                                                                    | 20, 59                      | 23, 59                     | 17, 59                     | 21.7, 61.0                  | 28.3, 61.2                 | 19.6, 60.3                |
| Missing                                                                                     | 3 (1.5%)                    | 6 (3.2%)                   | 13 (6.8%)                  | 28 (22.2%)                  | 27 (23.3%)                 | 6 (8.7%)                  |
| <b>SF-36: Mental Component Score (MCS)</b>                                                  |                             |                            |                            |                             |                            |                           |
| n                                                                                           | 187                         | 184                        | 177                        | 98                          | 89                         | 63                        |
| Mean (SD)                                                                                   | 40.2 (10.50)                | 44.7 (10.29)               | 45.3 (10.21)               | 39.1 (12.0)                 | 43.5 (11.3)                | 44.4 (12.3)               |
| Median                                                                                      | 39.4                        | 45.5                       | 45.4                       | 38.2                        | 45.1                       | 45.6                      |
| Min, Max                                                                                    | 18, 65                      | 16, 64                     | 18, 63                     | 17.2, 62.3                  | 22.5, 62.1                 | 17.5, 61.9                |
| Missing                                                                                     | 3 (1.5%)                    | 6 (3.2%)                   | 13 (6.8%)                  | 28 (22.2%)                  | 27 (23.3%)                 | 6 (8.7%)                  |
| <b>Functional Assessment of Chronic Illness Therapy-Fatigue Scale (FACIT-F) Total Score</b> |                             |                            |                            |                             |                            |                           |
| n                                                                                           | 187                         | 184                        | 177                        |                             |                            |                           |
| Mean (SD)                                                                                   | 24.3 (9.66)                 | 31.0 (10.74)               | 32.6 (10.51)               |                             |                            |                           |
| Median                                                                                      | 24.0                        | 32.0                       | 34.0                       |                             |                            |                           |
| Min, Max                                                                                    | 1, 51                       | 6, 51                      | 5, 51                      |                             |                            |                           |
| Missing                                                                                     | 3 (1.5%)                    | 6 (3.2%)                   | 13 (6.8%)                  |                             |                            |                           |
| <b>Multidimensional Fatigue Inventory (MFI)</b>                                             |                             |                            |                            |                             |                            |                           |

**Supplementary Table 4: COA score descriptive statistics at each timepoint for both analysis samples**

| Clinical Outcome Assessment | Phase IIb analyses          |                            |                            | Pooled analyses             |                            |                           |
|-----------------------------|-----------------------------|----------------------------|----------------------------|-----------------------------|----------------------------|---------------------------|
|                             | Baseline assessment (N=190) | Week 12 assessment (N=190) | Week 24 assessment (N=190) | Baseline assessment (N=126) | Week 12 assessment (N=116) | Week 24 assessment (N=69) |
| n                           |                             |                            |                            | 101                         | 91                         | 67                        |
| Mean (SD)                   |                             |                            |                            | 67.2 (15.4)                 | 58.6 (17.8)                | 57.9 (18.1)               |
| Median                      |                             |                            |                            | 70.0                        | 61.0                       | 61.0                      |
| Minimum - Maximum           |                             |                            |                            | 28.0, 94.0                  | 24.0, 100.0                | 20.0, 95.0                |
| Missing (%)                 |                             |                            |                            | 25 (19.8%)                  | 25 (21.6%)                 | 2 (2.9%)                  |

Shaded cells indicate that COA was not administered in trial, hence descriptive statistics are not available.

## Supplementary Table 5a

Supplementary Table 5a. Change correlations between ESSPRI total score and proposed anchors for Phase IIb analysis

| Proposed Anchor                        | ESSPRI Change in Total Score |                                   |         |
|----------------------------------------|------------------------------|-----------------------------------|---------|
|                                        | n                            | corr. ( $r_{\text{polyserial}}$ ) | p-value |
| PaGA (Stratification A) <sup>[1]</sup> | 175                          | 0.56                              | <0.001  |
| PaGA (Stratification B) <sup>[1]</sup> | 175                          | 0.54                              | <0.001  |
| PaGA (Stratification C) <sup>[1]</sup> | 175                          | 0.57                              | <0.001  |
| FACIT-F <sup>[2]</sup>                 | 175                          | 0.56                              | <0.001  |
| PhGA (Stratification A) <sup>[3]</sup> | 168                          | 0.37                              | <0.001  |
| PhGA (Stratification B) <sup>[3]</sup> | 168                          | 0.36                              | <0.001  |
| PhGA (Stratification C) <sup>[3]</sup> | 168                          | 0.37                              | <0.001  |
| ESSDAI <sup>[4]</sup>                  | 177                          | 0.16                              | 0.062   |
| SF-36: PCS <sup>[5]</sup>              | 175                          | 0.55                              | <0.001  |
| SF-36: MCS <sup>[5]</sup>              | 175                          | 0.25                              | 0.001   |

Note: The ESSPRI total score is based on the average score of the three ESSPRI items. The score ranges from 0-10 with higher scores indicative of more severe disease.

[1] PaGA anchors are defined ordinally based upon change from baseline by (A and B) millimetre or (C) distributional changes in the measure. Ordinal scores range from 1-5 with higher score indicating worsening.

[2] FACIT-F anchors are defined ordinally based on points change from baseline. Ordinal scores range from 1-5 with higher score indicating worsening.

[3] PhGA anchors are defined ordinally based upon change from baseline by (A and B) millimetre or (C) distributional changes in the measure. Ordinal scores range from 1-5 with higher score indicating worsening.

[4] ESSDAI anchors are defined ordinally based on points change from baseline. Ordinal scores range from 1-5 with higher score indicating worsening.

[5] SF-36 component score anchors are defined ordinally based on points change from baseline. Ordinal scores range from 1-5 with higher score indicating worsening.

| KEY | Low association (0.10- <0.30) | Moderate association (0.30- <0.70) | Large association (>0.70) |
|-----|-------------------------------|------------------------------------|---------------------------|
|     |                               |                                    |                           |



## Supplementary Table 5b

Supplementary Table 5b. Change correlations between ESSPRI total score and proposed anchors for pooled analysis

| Proposed Anchor                        | ESSPRI Change in Total Score |                                   |         |
|----------------------------------------|------------------------------|-----------------------------------|---------|
|                                        | n                            | corr. ( $r_{\text{polyserial}}$ ) | p-value |
| PaGA (Stratification A) <sup>[1]</sup> | 68                           | 0.66                              | <0.001  |
| PaGA (Stratification B) <sup>[1]</sup> | 68                           | 0.60                              | <0.001  |
| PaGA (Stratification C) <sup>[1]</sup> | 68                           | 0.71                              | <0.001  |
| MFI <sup>[2]</sup>                     | 67                           | 0.63                              | <0.001  |
| PhGA (Stratification A) <sup>[3]</sup> | 67                           | 0.72                              | <0.001  |
| PhGA (Stratification B) <sup>[3]</sup> | 67                           | 0.70                              | <0.001  |
| PhGA (Stratification C) <sup>[3]</sup> | 67                           | 0.68                              | <0.001  |
| ESSDAI <sup>[4]</sup>                  | 68                           | 0.32                              | 0.007   |
| SF-36: PCS <sup>[5]</sup>              | 62                           | 0.56                              | <0.001  |
| SF-36: MCS <sup>[5]</sup>              | 62                           | 0.49                              | 0.001   |

Note: The ESSPRI total score is based on the average score of the three ESSPRI items. The score ranges from 0-10 with higher scores indicative of more severe disease.

[1] PaGA anchors are defined ordinally based upon change from baseline by (A and B) millimetre or (C) distributional changes in the measure. Ordinal scores range from 1-5 with higher score indicating worsening.

[2] MFI anchors are defined ordinally based on points change from baseline. Ordinal scores range from 1-5 with higher score indicating worsening.

[3] PhGA anchors are defined ordinally based upon change from baseline by (A and B) millimetre or (C) distributional changes in the measure. Ordinal scores range from 1-5 with higher score indicating worsening.

[4] ESSDAI anchors are defined ordinally based on points change from baseline. Ordinal scores range from 1-5 with higher score indicating worsening.

[5] SF-36 component score anchors are defined ordinally based on points change from baseline. Ordinal scores range from 1-5 with higher score indicating worsening.

| KEY | Low association (0.10- <0.30) | Moderate association (0.30- <0.70) | Large association (>0.70) |
|-----|-------------------------------|------------------------------------|---------------------------|
|     |                               |                                    |                           |

## Supplementary Figures

### Boxplots to support interpretation of ESSPRI symptom severity cutpoints\*

The following figures show the boxplots to support the interpretation of ESSPRI severity cutpoints.

\* The blue band shows the range within which a chosen cut-point could represent low/minimal symptom severity thresholds and the red band shows the range within which a chosen cut point could represent the highest severity threshold

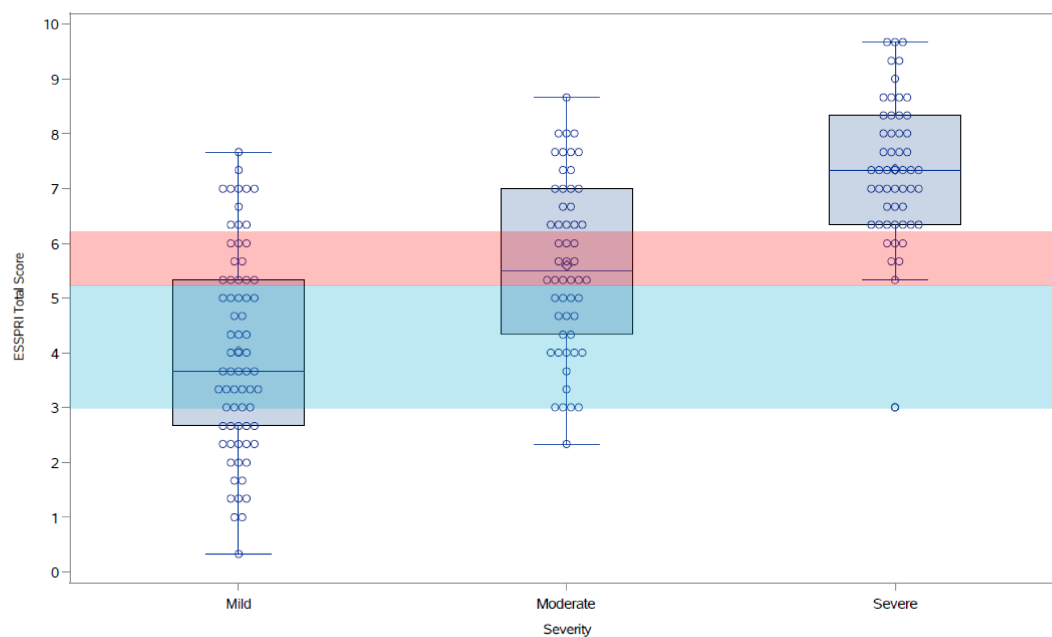

**Supplementary Figure 1. Box plots showing the spread of ESSPRI scores for the three severity groups of patients based on the PaGA Stratification A anchor ( $40\text{mm} < x \leq 60\text{mm}$ ) at Week 24 (Phase IIb Analysis)\***

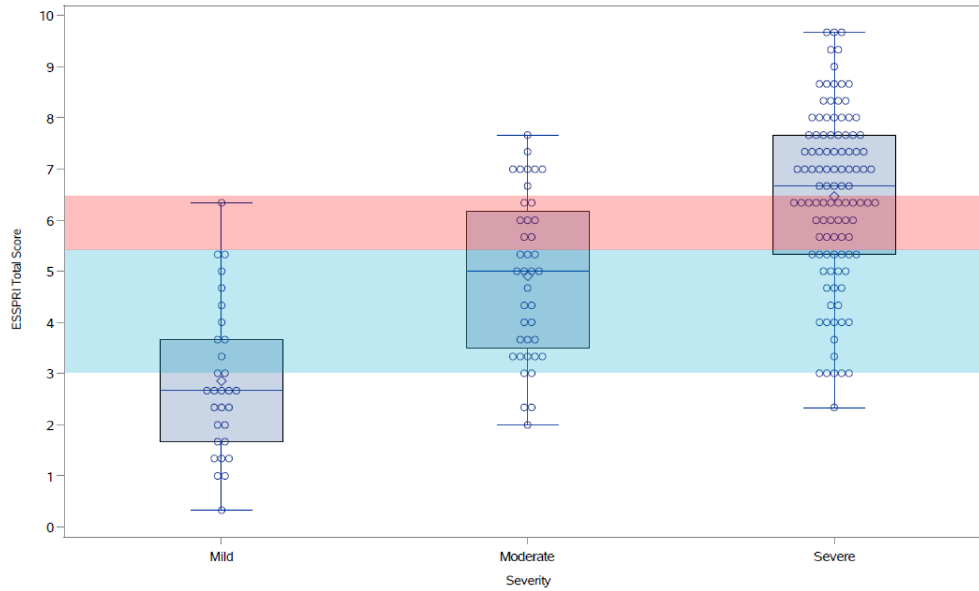

**Supplementary Figure 2.** Box plots showing the spread of ESSPRI scores for the three severity groups of patients based on the PaGA Stratification B anchor ( $20\text{mm} <x \leq 40\text{mm}$ ) at Week 24 (Phase IIb Analysis)\*

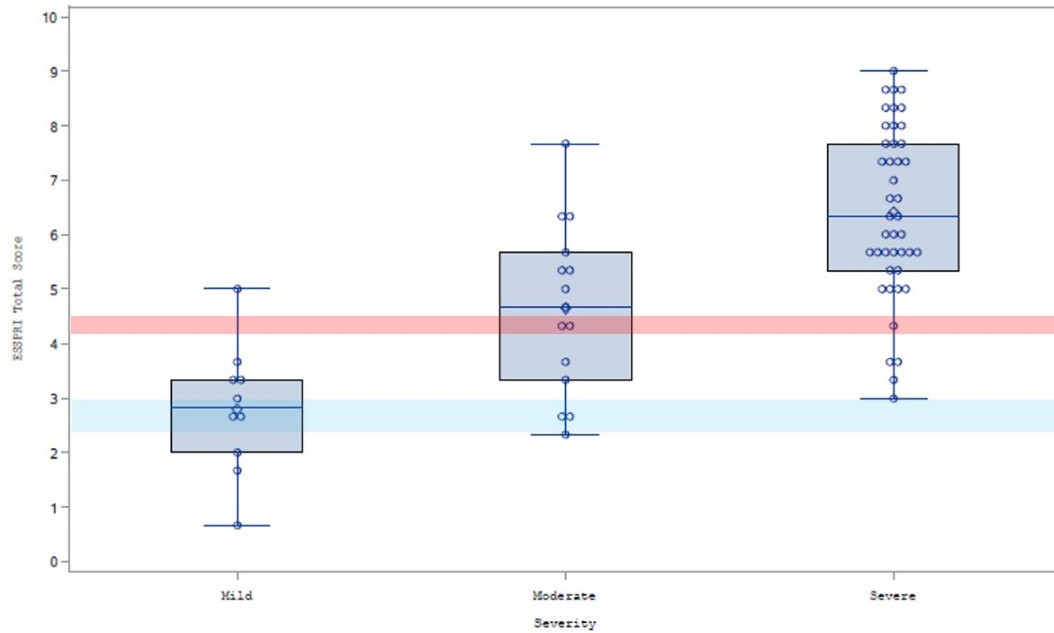

Supplementary Figure 3. Box plots showing the spread of ESSPRI total scores for the three severity groups of patients based on the PaGA Stratification B at Week 24 (pooled analysis)\*

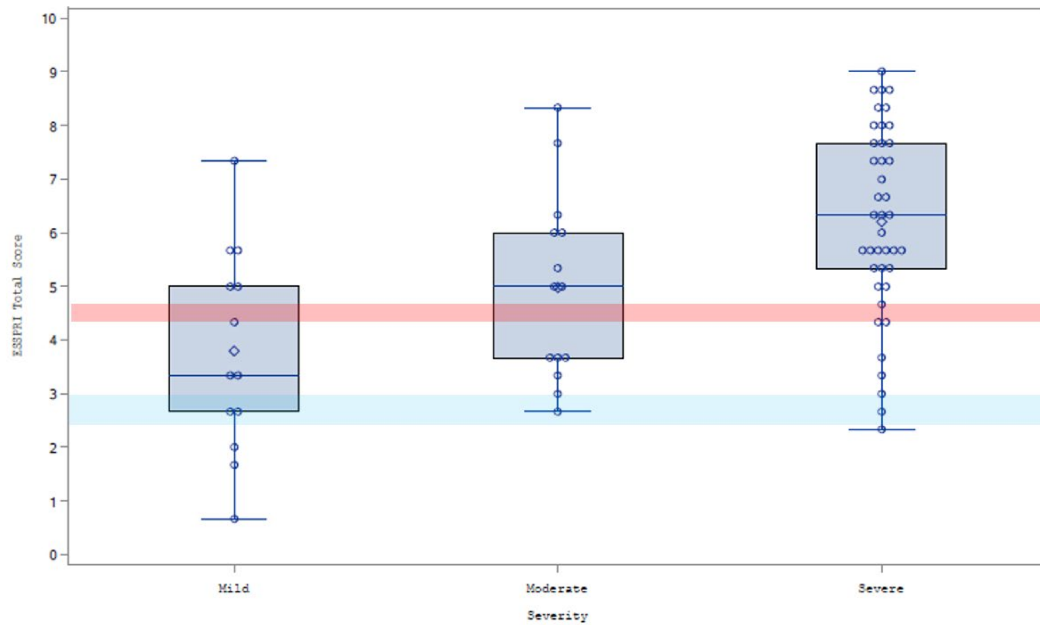

Supplementary Figure 4. Box plots showing the spread of ESSPRI total scores for the three severity groups of patients based on the PhGA Stratification B at Week 24 (pooled analysis)\*

## REFERENCES

1. Seror R, Ravaud P, Mariette X, et al. EULAR Sjogren's Syndrome Patient Reported Index (ESSPRI): Development of a consensus patient index for primary Sjogren's syndrome. *Ann Rheum Dis* 2011;70(6):968-72. doi: 10.1136/ard.2010.143743 [published Online First: 2011/02/25]
2. Seror R, Ravaud P, Bowman SJ, et al. EULAR Sjögren's syndrome disease activity index: Development of a consensus systemic disease activity index for primary Sjögren's syndrome. *Annals of the Rheumatic Diseases* 2010;69(6):1103-09.
3. Ware Jr JE. SF-36 health survey. 1999
4. Kosinski M, Gajria K, Fernandes A, et al. Qualitative validation of the FACIT-fatigue scale in systemic lupus erythematosus. *Lupus* 2013;22(5):422-30.
5. Smets E, Garssen B, Bonke Bd, et al. The Multidimensional Fatigue Inventory (MFI) psychometric qualities of an instrument to assess fatigue. *Journal of psychosomatic research* 1995;39(3):315-25.
6. Farrar JT, Young Jr JP, LaMoreaux L, et al. Clinical importance of changes in chronic pain intensity measured on an 11-point numerical pain rating scale. *Pain* 2001;94(2):149-58.
7. Katz NP, Paillard FC, Ekman E. Determining the clinical importance of treatment benefits for interventions for painful orthopedic conditions. *Journal of orthopaedic surgery and research* 2015;10(1):1-11.
8. Wells GA, Boers M, Shea B, et al. Minimal disease activity for rheumatoid arthritis: a preliminary definition. *The Journal of rheumatology* 2005;32(10):2016-24.
9. Wells GA, Boers M, Shea B, et al. Minimal disease activity for rheumatoid arthritis: a preliminary definition. 2005;32(10):2016-24.
10. Norman GR, Sloan JA, Wyrwich KW. The truly remarkable universality of half a standard deviation: confirmation through another look. *Expert review of pharmacoeconomics & outcomes research* 2004;4(5):581-85.
11. Nordin Å, Taft C, Lundgren-Nilsson Å, et al. Minimal important differences for fatigue patient reported outcome measures—a systematic review. *BMC medical research methodology* 2016;16(1):62.
12. Orbai A-M, Bingham CO. Patient reported outcomes in rheumatoid arthritis clinical trials. *Current rheumatology reports* 2015;17(4):28.
13. Seror R, Bootsma H, Saraux A, et al. Defining disease activity states and clinically meaningful improvement in primary Sjögren's syndrome with EULAR primary Sjögren's syndrome disease activity (ESSDAI) and patient-reported indexes (ESSPRI). *Annals of the rheumatic diseases* 2016;75(2):382-89.
14. Ward MM, Guthrie LC, Alba MI. Clinically important changes in short form 36 health survey scales for use in rheumatoid arthritis clinical trials: the impact of low responsiveness. *Arthritis care & research* 2014;66(12):1783-89.
